# Supplementary material for: Sequential Transcriptome Changes in the Penumbra after Ischemic Stroke
Source: MDPI journal article supplement (doi:10.3390/ijms20246349), 2019-12-16
Supplement: s1 [file s1]

## Top 10 Genes in the Protein–Protein Interaction (PPI) Network of Biological Processes in Gene Ontology Analysis

| 1 week                              |                                                    |         | 4 weeks                                                               |                                                                                         |        | 8 weeks                                                                  |                                    |        |
|-------------------------------------|----------------------------------------------------|---------|-----------------------------------------------------------------------|-----------------------------------------------------------------------------------------|--------|--------------------------------------------------------------------------|------------------------------------|--------|
| Brain development (total 234 genes) |                                                    |         | Positive regulation of cell population proliferation (total 57 genes) |                                                                                         |        | Negative regulation of multicellular organismal process (total 73 genes) |                                    |        |
| gene_sym<br>bol                     | description                                        | Fc      | gene_sym<br>bol                                                       | description                                                                             | Fc     | gene_sym<br>bol                                                          | description                        | Fc     |
| Tp53                                | tumor protein p53                                  | 2.754   | Igf1                                                                  | insulin-like growth factor 1                                                            | 2.352  | Cd44                                                                     | CD44 molecule (Indian blood group) | 6.132  |
| Casp3                               | caspase 3                                          | 2.403   | Ptpnc                                                                 | protein tyrosine phosphatase, receptor type, C                                          | 2.640  | Timp1                                                                    | TIMP metalloproteinase inhibitor 1 | 6.297  |
| Rhoa                                | ras homolog family member A                        | 2.253   | Timp1                                                                 | TIMP metalloproteinase inhibitor 1                                                      | 7.381  | Ccl2                                                                     | C-C motif chemokine ligand 2       | 2.657  |
| Gnai1                               | G protein subunit alpha i1                         | -2.844  | Cxcl12                                                                | C-X-C motif chemokine ligand 12                                                         | 2.135  | Tgfb1                                                                    | transforming growth factor, beta 1 | 2.045  |
| Syt1                                | synaptotagmin 1                                    | -20.346 | Mmp2                                                                  | matrix metalloproteinase 2                                                              | 2.172  | Spp1                                                                     | secreted phosphoprotein 1          | 9.088  |
| Grin2a                              | glutamate ionotropic receptor NMDA type subunit 2A | -3.675  | Tgfb1                                                                 | transforming growth factor, beta 1                                                      | 2.095  | Col3a1                                                                   | collagen type III alpha 1 chain    | 13.728 |
| Ccr5                                | chemokine (C-C motif) receptor 5                   | 3.140   | Lgals3                                                                | lectin, galactoside-binding, soluble, 3                                                 | 36.529 | Vim                                                                      | vimentin                           | 10.175 |
| Myc                                 | myelocytomatosis oncogene                          | 5.493   | Rac2                                                                  | ras-related C3 botulinum toxin substrate 2 (rho family, small GTP binding protein Rac2) | 2.589  | Dcn                                                                      | decorin                            | 6.114  |
| Aif1                                | allograft inflammatory factor 1                    | 10.359  | Hmox1                                                                 | heme oxygenase 1                                                                        | 2.392  | Cd74                                                                     | CD74 molecule                      | 15.205 |
| Gnao1                               | G protein subunit alpha o1                         | -5.734  | Igf2                                                                  | insulin-like growth factor 2                                                            | 25.058 | Anxa1                                                                    | annexin A1                         | 10.742 |
| Memory (total 76 genes)             |                                                    |         | Wound healing (total 32 genes)                                        |                                                                                         |        | Response to estradiol (total 27 genes)                                   |                                    |        |
| gene_sym<br>bol                     | description                                        | Fc      | gene_sym<br>bol                                                       | description                                                                             | Fc     | gene_sym<br>bol                                                          | description                        | Fc     |

|                                             |                                                    |          |                                        |                                           |        |                                             |                                               |        |
|---------------------------------------------|----------------------------------------------------|----------|----------------------------------------|-------------------------------------------|--------|---------------------------------------------|-----------------------------------------------|--------|
| Bdnf                                        | brain-derived neurotrophic factor                  | -3.076   | Timp1                                  | TIMP metalloproteinase inhibitor 1        | 7.381  | Ccl2                                        | C-C motif chemokine ligand 2                  | 2.657  |
| Gria1                                       | glutamate ionotropic receptor AMPA type subunit 1  | -4.583   | Igf1                                   | insulin-like growth factor 1              | 2.352  | Col1a1                                      | collagen, type I, alpha 1                     | 13.868 |
| Grin2b                                      | glutamate ionotropic receptor NMDA type subunit 2B | -2.394   | Sparc                                  | secreted protein acidic and cysteine rich | 2.122  | Igf2                                        | insulin-like growth factor 2                  | 28.159 |
| Grin2a                                      | glutamate ionotropic receptor NMDA type subunit 2A | -3.675   | Tgfb1                                  | transforming growth factor, beta 1        | 2.095  | Tgfb1                                       | transforming growth factor, beta 1            | 2.045  |
| Slc17a7                                     | solute carrier family 17 member 7                  | -134.524 | Col1a1                                 | collagen, type I, alpha 1                 | 15.053 | Vim                                         | vimentin                                      | 10.175 |
| Cnr1                                        | cannabinoid receptor 1 (brain)                     | -3.649   | Dcn                                    | decorin                                   | 4.806  | Nqo1                                        | NAD(P)H quinone dehydrogenase 1               | 2.160  |
| Egr1                                        | early growth response 1                            | -3.205   | Cd44                                   | CD44 molecule (Indian blood group)        | 7.931  | Anxa1                                       | annexin A1                                    | 10.742 |
| Htr2a                                       | 5-hydroxytryptamine receptor 2A                    | -3.237   | Igf2                                   | insulin-like growth factor 2              | 25.058 | Igfbp3                                      | insulin-like growth factor binding protein 3  | 5.342  |
| Snap25                                      | synaptosomal-associated protein 25                 | -226.767 | Col3a1                                 | collagen type III alpha 1 chain           | 18.130 | Cd4                                         | Cd4 molecule                                  | 2.380  |
| Cck                                         | cholecystokinin                                    | -98.243  | Pf4                                    | platelet factor 4                         | 2.857  | Pdgfra                                      | platelet derived growth factor receptor alpha | 2.334  |
| Cellular response to drug (total 140 genes) |                                                    |          | Response to estradiol (total 27 genes) |                                           |        | Cellular response to lipid (total 43 genes) |                                               |        |
| gene_sym<br>bol                             | description                                        | Fc       | gene_sym<br>bol                        | description                               | Fc     | gene_sym<br>bol                             | description                                   | Fc     |
| Tp53                                        | tumor protein p53                                  | 2.754    | Igf1                                   | insulin-like growth factor 1              | 2.352  | Ccl2                                        | C-C motif chemokine ligand 2                  | 2.657  |
| Mapk8                                       | mitogen-activated protein kinase 8                 | -2.178   | Col1a1                                 | collagen, type I, alpha 1                 | 15.053 | Icam1                                       | intercellular adhesion molecule 1             | 2.102  |
| Ccl2                                        | C-C motif chemokine ligand 2                       | 22.318   | Igf2                                   | insulin-like growth factor 2              | 25.058 | Cd40                                        | CD40 molecule                                 | 2.275  |
| Myc                                         | myelocytomatosis oncogene                          | 5.493    | Mmp2                                   | matrix metalloproteinase 2                | 2.172  | Cxcl13                                      | C-X-C motif chemokine ligand 13               | 2.306  |
| Icam1                                       | intercellular adhesion molecule 1                  | 6.542    | Tgfb1                                  | transforming growth factor, beta 1        | 2.095  | Tgfb1                                       | transforming growth factor, beta 1            | 2.045  |
| Igf1                                        | insulin-like growth factor 1                       | 52.188   | Vim                                    | vimentin                                  | 13.221 | Il18                                        | interleukin 18                                | 2.361  |

|                                                            |                                    |         |                                   |                                               |        |                                                        |                                    |        |
|------------------------------------------------------------|------------------------------------|---------|-----------------------------------|-----------------------------------------------|--------|--------------------------------------------------------|------------------------------------|--------|
| Hmox1                                                      | heme oxygenase 1                   | 52.116  | Bmp7                              | bone morphogenetic protein 7                  | 5.416  | Spp1                                                   | secreted phosphoprotein 1          | 9.088  |
| Rhoa                                                       | ras homolog family member A        | 2.253   | Igfbp3                            | insulin-like growth factor binding protein 3  | 2.123  | Col1a1                                                 | collagen, type I, alpha 1          | 13.868 |
| Il18                                                       | interleukin 18                     | 10.222  | Pdgfra                            | platelet derived growth factor receptor alpha | 2.655  | Cxcl16                                                 | C-X-C motif chemokine ligand 16    | 6.413  |
| Gnai2                                                      | G protein subunit alpha i2         | 2.307   | Igfbp2                            | insulin-like growth factor binding protein 2  | 14.026 | Pf4                                                    | platelet factor 4                  | 3.404  |
| Positive regulation of apoptotic process (total 181 genes) |                                    |         | Aging (total 34 genes)            |                                               |        | Positive regulation of cell migration (total 39 genes) |                                    |        |
| gene_sym<br>bol                                            | description                        | Fc      | gene_sym<br>bol                   | description                                   | Fc     | gene_sym<br>bol                                        | description                        | Fc     |
| Tp53                                                       | tumor protein p53                  | 2.754   | Igf1                              | insulin-like growth factor 1                  | 2.352  | Cxcl12                                                 | C-X-C motif chemokine ligand 12    | 2.445  |
| Casp3                                                      | caspase 3                          | 2.403   | Tgfb1                             | transforming growth factor, beta 1            | 2.095  | Ccl2                                                   | C-C motif chemokine ligand 2       | 2.657  |
| Mapk8                                                      | mitogen-activated protein kinase 8 | -2.178  | Timp1                             | TIMP metalloproteinase inhibitor 1            | 7.381  | Icam1                                                  | intercellular adhesion molecule 1  | 2.102  |
| Myc                                                        | myelocytomatosis oncogene          | 5.493   | Mmp2                              | matrix metalloproteinase 2                    | 2.172  | Cxcl13                                                 | C-X-C motif chemokine ligand 13    | 2.306  |
| Tlr4                                                       | toll-like receptor 4               | 3.459   | Fos                               | FBJ osteosarcoma oncogene                     | -2.657 | Ccl19                                                  | C-C motif chemokine ligand 19      | 3.688  |
| Ccl2                                                       | C-C motif chemokine ligand 2       | 22.318  | Clu                               | clusterin                                     | 2.194  | Col1a1                                                 | collagen, type I, alpha 1          | 13.868 |
| Mmp9                                                       | matrix metalloproteinase 9         | 17.343  | Dcn                               | decorin                                       | 4.806  | Anxa1                                                  | annexin A1                         | 10.742 |
| Casp8                                                      | caspase 8                          | 3.386   | Serping1                          | serpin family G member 1                      | 21.823 | Cd40                                                   | CD40 molecule                      | 2.275  |
| Agt                                                        | angiotensinogen                    | -18.171 | Vim                               | vimentin                                      | 13.221 | Il18                                                   | interleukin 18                     | 2.361  |
| Anxa5                                                      | annexin A5                         | 2.050   | Ucp2                              | uncoupling protein 2                          | 2.745  | Aif1                                                   | allograft inflammatory factor 1    | 2.155  |
| Regulation of synaptic vesicle exocytosis (total 59 genes) |                                    |         | Response to drug (total 64 genes) |                                               |        | Cell adhesion (total 44 genes)                         |                                    |        |
| gene_sym<br>bol                                            | description                        | Fc      | gene_sym<br>bol                   | description                                   | Fc     | gene_sym<br>bol                                        | description                        | Fc     |
| Syt1                                                       | synaptotagmin 1                    | -20.346 | Mmp2                              | matrix metalloproteinase 2                    | 2.172  | Cd44                                                   | CD44 molecule (Indian blood group) | 6.132  |
| Stxbp1                                                     | syntaxin binding protein 1         | -7.151  | Igf1                              | insulin-like growth factor 1                  | 2.352  | Spp1                                                   | secreted phosphoprotein 1          | 9.088  |
| Stx1a                                                      | syntaxin 1A                        | -23.647 | Col1a1                            | collagen, type I, alpha 1                     | 15.053 | Cxcl12                                                 | C-X-C motif chemokine ligand 12    | 2.445  |

|                                                                |                                                         |          |                               |                                              |        |                                                    |                                             |        |
|----------------------------------------------------------------|---------------------------------------------------------|----------|-------------------------------|----------------------------------------------|--------|----------------------------------------------------|---------------------------------------------|--------|
| Rab3a                                                          | RAB3A, member RAS oncogene family                       | -23.394  | Tgfb1                         | transforming growth factor, beta 1           | 2.095  | Icam1                                              | intercellular adhesion molecule 1           | 2.102  |
| Cplx1                                                          | complexin 1                                             | -62.030  | Fos                           | FBJ osteosarcoma oncogene                    | -2.657 | Col3a1                                             | collagen type III alpha 1 chain             | 13.728 |
| Syt2                                                           | synaptotagmin 2                                         | -8.045   | Hmox1                         | heme oxygenase 1                             | 2.392  | Lamb2                                              | laminin subunit beta 2                      | 2.149  |
| Vamp1                                                          | vesicle-associated membrane protein 1                   | -14.025  | Igf2                          | insulin-like growth factor 2                 | 25.058 | Itgb4                                              | integrin subunit beta 4                     | 10.949 |
| Cplx2                                                          | complexin 2                                             | -18.489  | Sparc                         | secreted protein acidic and cysteine rich    | 2.122  | Thbs2                                              | thrombospondin 2                            | 3.492  |
| Syp                                                            | synaptophysin                                           | -44.394  | Vim                           | vimentin                                     | 13.221 | Tgfr2                                              | transforming growth factor, beta receptor 2 | 2.195  |
| Camk2a                                                         | calcium/calmodulin-dependent protein kinase II alpha    | -139.806 | Gpx1                          | glutathione peroxidase 1                     | 2.167  | Postn                                              | periostin                                   | -2.405 |
| Regulation of postsynaptic membrane potential (total 58 genes) |                                                         |          | Ossification (total 24 genes) |                                              |        | Extracellular matrix organization (total 25 genes) |                                             |        |
| gene_sym<br>bol                                                | description                                             | Fc       | gene_sym<br>bol               | description                                  | Fc     | gene_sym<br>bol                                    | description                                 | Fc     |
| Gria1                                                          | glutamate ionotropic receptor AMPA type subunit 1       | -4.583   | Igf1                          | insulin-like growth factor 1                 | 2.352  | Col1a1                                             | collagen, type I, alpha 1                   | 13.868 |
| Grin2a                                                         | glutamate ionotropic receptor NMDA type subunit 2A      | -3.675   | Spp1                          | secreted phosphoprotein 1                    | 10.971 | Col3a1                                             | collagen type III alpha 1 chain             | 13.728 |
| Grm5                                                           | glutamate metabotropic receptor 5                       | -3.177   | Mmp2                          | matrix metalloproteinase 2                   | 2.172  | Lum                                                | lumican                                     | 2.924  |
| Gabra1                                                         | gamma-aminobutyric acid type A receptor alpha1 subunit  | -26.419  | Col1a1                        | collagen, type I, alpha 1                    | 15.053 | Postn                                              | periostin                                   | -2.405 |
| Gabrg2                                                         | gamma-aminobutyric acid type A receptor gamma 2 subunit | -12.334  | Sparc                         | secreted protein acidic and cysteine rich    | 2.122  | Fbln1                                              | fibulin 1                                   | 6.400  |
| Grin2b                                                         | glutamate ionotropic receptor NMDA type subunit 2B      | -2.394   | Igf2                          | insulin-like growth factor 2                 | 25.058 | Mmp14                                              | matrix metalloproteinase 14                 | 6.884  |
| Gabrb2                                                         | gamma-aminobutyric acid type A receptor beta 2 subunit  | -6.061   | Tgfb1                         | transforming growth factor, beta 1           | 2.095  | Fmod                                               | fibromodulin                                | 7.465  |
| Gria2                                                          | glutamate ionotropic receptor AMPA type subunit 2       | -8.968   | Igfbp5                        | insulin-like growth factor binding protein 5 | 2.649  | Tgfb1                                              | transforming growth factor, beta 1          | 2.045  |

|                                      |                                                          |          |                                                                       |                                             |        |                                                                       |                                         |        |
|--------------------------------------|----------------------------------------------------------|----------|-----------------------------------------------------------------------|---------------------------------------------|--------|-----------------------------------------------------------------------|-----------------------------------------|--------|
| Grm1                                 | glutamate receptor, metabotropic 1                       | -2.475   | Ctsk                                                                  | cathepsin K                                 | 3.212  | Lgals3                                                                | lectin, galactoside-binding, soluble, 3 | 21.687 |
| Grik1                                | glutamate ionotropic receptor kainate type subunit 1     | -3.151   | Twist1                                                                | twist family bHLH transcription factor 1    | 2.436  | Col18a1                                                               | collagen type XVIII alpha 1 chain       | 3.034  |
| locomotory behavior (total 91 genes) |                                                          |          | Negative regulation of cell population proliferation (total 41 genes) |                                             |        | Aging (total 34 genes)                                                |                                         |        |
| gene_sym<br>bol                      | description                                              | Fc       | gene_sym<br>bol                                                       | description                                 | Fc     | gene_sym<br>bol                                                       | description                             | Fc     |
| Gad1                                 | glutamate decarboxylase 1                                | -3.543   | Igf1                                                                  | insulin-like growth factor 1                | 2.352  | Ccl2                                                                  | C-C motif chemokine ligand 2            | 2.657  |
| Scn1a                                | sodium voltage-gated channel alpha subunit 1             | -9.277   | Cd44                                                                  | CD44 molecule (Indian blood group)          | 7.931  | Tgfb1                                                                 | transforming growth factor, beta 1      | 2.045  |
| Snap25                               | synaptosomal-associated protein 25                       | -226.767 | Tgfb1                                                                 | transforming growth factor, beta 1          | 2.095  | Timp1                                                                 | TIMP metalloproteinase inhibitor 1      | 6.297  |
| Ppp1r1b                              | protein phosphatase 1, regulatory (inhibitor) subunit 1B | -4.625   | Sparc                                                                 | secreted protein acidic and cysteine rich   | 2.122  | Icam1                                                                 | intercellular adhesion molecule 1       | 2.102  |
| Adora2a                              | adenosine A2a receptor                                   | -2.655   | Tgfb2                                                                 | transforming growth factor, beta receptor 2 | 2.579  | Clu                                                                   | clusterin                               | 2.292  |
| Mapk8                                | mitogen-activated protein kinase 8                       | -2.178   | Lgals3                                                                | lectin, galactoside-binding, soluble, 3     | 36.529 | Gpx1                                                                  | glutathione peroxidase 1                | 2.092  |
| Gnao1                                | G protein subunit alpha o1                               | -5.734   | Hmox1                                                                 | heme oxygenase 1                            | 2.392  | Nqo1                                                                  | NAD(P)H quinone dehydrogenase 1         | 2.160  |
| Cacna1a                              | calcium voltage-gated channel subunit alpha1 A           | -5.096   | Bmp7                                                                  | bone morphogenetic protein 7                | 5.416  | Itgb2                                                                 | integrin subunit beta 2                 | 2.361  |
| Grm5                                 | glutamate metabotropic receptor 5                        | -3.177   | Timp2                                                                 | TIMP metalloproteinase inhibitor 2          | 2.291  | Serp1g1                                                               | serpin family G member 1                | 16.626 |
| Grm1                                 | glutamate receptor, metabotropic 1                       | -2.475   | Gpc3                                                                  | glypican 3                                  | 4.840  | Mbp                                                                   | myelin basic protein                    | -3.010 |
| Aging (total 138 genes)              |                                                          |          | Cellular response to cytokine stimulus (total 42 genes)               |                                             |        | Negative regulation of cell population proliferation (total 42 genes) |                                         |        |
| gene_sym<br>bol                      | description                                              | Fc       | gene_sym<br>bol                                                       | description                                 | Fc     | gene_sym<br>bol                                                       | description                             | Fc     |

|                                                        |                                                         |         |                                                 |                                            |        |                                        |                                                |        |
|--------------------------------------------------------|---------------------------------------------------------|---------|-------------------------------------------------|--------------------------------------------|--------|----------------------------------------|------------------------------------------------|--------|
| Tp53                                                   | tumor protein p53                                       | 2.754   | Cxcl12                                          | C-X-C motif chemokine ligand 12            | 2.135  | Cd44                                   | CD44 molecule (Indian blood group)             | 6.132  |
| Igf1                                                   | insulin-like growth factor 1                            | 52.188  | Cd44                                            | CD44 molecule (Indian blood group)         | 7.931  | Lgals3                                 | lectin, galactoside-binding, soluble, 3        | 21.687 |
| Stat3                                                  | signal transducer and activator of transcription 3      | 2.550   | Mmp2                                            | matrix metalloproteinase 2                 | 2.172  | Ccl2                                   | C-C motif chemokine ligand 2                   | 2.657  |
| Agt                                                    | angiotensinogen                                         | -18.171 | Spp1                                            | secreted phosphoprotein 1                  | 10.971 | Tgfb1                                  | transforming growth factor, beta 1             | 2.045  |
| Mmp9                                                   | matrix metalloproteinase 9                              | 17.343  | Col1a1                                          | collagen, type I, alpha 1                  | 15.053 | Tgfb2                                  | transforming growth factor, beta receptor 2    | 2.195  |
| Bdnf                                                   | brain-derived neurotrophic factor                       | -3.076  | Ifitm1                                          | interferon induced transmembrane protein 1 | 34.439 | Aif1                                   | allograft inflammatory factor 1                | 2.155  |
| Icam1                                                  | intercellular adhesion molecule 1                       | 6.542   | Cd74                                            | CD74 molecule                              | 10.829 | Fcgr2b                                 | Fc fragment of IgG, low affinity IIb, receptor | 2.119  |
| Ccl2                                                   | C-C motif chemokine ligand 2                            | 22.318  | Ifitm3                                          | interferon induced transmembrane protein 3 | 4.490  | Gpc3                                   | glypican 3                                     | 3.974  |
| Fos                                                    | FBJ osteosarcoma oncogene                               | -2.452  | Gbp2                                            | guanylate binding protein 2                | 4.468  | Tspo                                   | translocator protein                           | 2.792  |
| Hras                                                   | Harvey rat sarcoma virus oncogene                       | -2.113  | Cyba                                            | cytochrome b-245 alpha chain               | 4.201  | Inhba                                  | inhibin beta A subunit                         | -2.184 |
| Regulation of cation channel activity (total 73 genes) |                                                         |         | Response to lipopolysaccharide (total 30 genes) |                                            |        | Inflammatory response (total 31 genes) |                                                |        |
| gene_symbol                                            | description                                             | Fc      | gene_symbol                                     | description                                | Fc     | gene_symbol                            | description                                    | Fc     |
| Dlg4                                                   | discs large MAGUK scaffold protein 4                    | -8.413  | Igf1                                            | insulin-like growth factor 1               | 2.352  | Ccl2                                   | C-C motif chemokine ligand 2                   | 2.657  |
| Cacna1a                                                | calcium voltage-gated channel subunit alpha1 A          | -5.096  | Spp1                                            | secreted phosphoprotein 1                  | 10.971 | Icam1                                  | intercellular adhesion molecule 1              | 2.102  |
| Cacng8                                                 | calcium voltage-gated channel auxiliary subunit gamma 8 | -9.076  | Col1a1                                          | collagen, type I, alpha 1                  | 15.053 | Timp1                                  | TIMP metalloproteinase inhibitor 1             | 6.297  |
| Cacng7                                                 | calcium voltage-gated channel auxiliary subunit gamma 7 | -4.678  | Fos                                             | FBJ osteosarcoma oncogene                  | -2.657 | Cd44                                   | CD44 molecule (Indian blood group)             | 6.132  |

|                                                                |                                                            |         |                                             |                                             |        |                                |                                    |        |
|----------------------------------------------------------------|------------------------------------------------------------|---------|---------------------------------------------|---------------------------------------------|--------|--------------------------------|------------------------------------|--------|
| Shank1                                                         | SH3 and multiple ankyrin repeat domains 1                  | -28.890 | Tgfb2                                       | transforming growth factor, beta receptor 2 | 2.579  | Spp1                           | secreted phosphoprotein 1          | 9.088  |
| Rasgrf1                                                        | RAS protein-specific guanine nucleotide-releasing factor 1 | -14.100 | Sparc                                       | secreted protein acidic and cysteine rich   | 2.122  | Ccl19                          | C-C motif chemokine ligand 19      | 3.688  |
| Cacnb1                                                         | calcium voltage-gated channel auxiliary subunit beta 1     | -6.682  | Tgfb1                                       | transforming growth factor, beta 1          | 2.095  | Pf4                            | platelet factor 4                  | 3.404  |
| Cacnb3                                                         | calcium voltage-gated channel auxiliary subunit beta 3     | -4.156  | Bmp7                                        | bone morphogenetic protein 7                | 5.416  | Itgb2                          | integrin subunit beta 2            | 2.361  |
| Cacnb2                                                         | calcium voltage-gated channel auxiliary subunit beta 2     | -2.618  | C3                                          | complement component 3                      | 8.255  | Il18                           | interleukin 18                     | 2.361  |
| Cacnb4                                                         | calcium voltage-gated channel auxiliary subunit beta 4     | -4.463  | Cyba                                        | cytochrome b-245 alpha chain                | 4.201  | Cxcl13                         | C-X-C motif chemokine ligand 13    | 2.306  |
| cellular response to organic cyclic compound (total 166 genes) |                                                            |         | Nervous system development (total 90 genes) |                                             |        | Wound healing (total 28 genes) |                                    |        |
| gene_sym<br>bol                                                | description                                                | Fc      | gene_sym<br>bol                             | description                                 | Fc     | gene_sym<br>bol                | description                        | Fc     |
| Casp3                                                          | caspase 3                                                  | 2.403   | Cd44                                        | CD44 molecule (Indian blood group)          | 7.931  | Timp1                          | TIMP metalloproteinase inhibitor 1 | 6.297  |
| Stat3                                                          | signal transducer and activator of transcription 3         | 2.550   | Igf1                                        | insulin-like growth factor 1                | 2.352  | Col1a1                         | collagen, type I, alpha 1          | 13.868 |
| Igf1                                                           | insulin-like growth factor 1                               | 52.188  | Mmp2                                        | matrix metalloproteinase 2                  | 2.172  | Tgfb1                          | transforming growth factor, beta 1 | 2.045  |
| Myc                                                            | myelocytomatosis oncogene                                  | 5.493   | Spp1                                        | secreted phosphoprotein 1                   | 10.971 | Dcn                            | decorin                            | 6.114  |
| Bdnf                                                           | brain-derived neurotrophic factor                          | -3.076  | Cxcl12                                      | C-X-C motif chemokine ligand 12             | 2.135  | Cd44                           | CD44 molecule (Indian blood group) | 6.132  |
| Ccl2                                                           | C-C motif chemokine ligand 2                               | 22.318  | Gfap                                        | glial fibrillary acidic protein             | 8.649  | Col3a1                         | collagen type III alpha 1 chain    | 13.728 |
| Rhoa                                                           | ras homolog family member A                                | 2.253   | Col3a1                                      | collagen type III alpha 1 chain             | 18.130 | Igf2                           | insulin-like growth factor 2       | 28.159 |
| Egr1                                                           | early growth response 1                                    | -3.205  | Fos                                         | FBJ osteosarcoma oncogene                   | -2.657 | Postn                          | periostin                          | -2.405 |
| Icam1                                                          | intercellular adhesion molecule 1                          | 6.542   | Vim                                         | vimentin                                    | 13.221 | Vim                            | vimentin                           | 10.175 |
| Actb                                                           | actin, beta                                                | 2.246   | Mmp14                                       | matrix metalloproteinase 14                 | 6.517  | Pf4                            | platelet factor 4                  | 3.404  |
