# Supplementary material for: Sequential Transcriptome Changes in the Penumbra after Ischemic Stroke
Source: MDPI journal article supplement (doi:10.3390/ijms20246349), 2019-12-16
Supplement: s1 [file s1]

# DEGs of higher degrees in PPI analysis

1week post stroke

| Gene Symbol | Description                                          | Degrees | Fc      |
|-------------|------------------------------------------------------|---------|---------|
| Dlg4        | discs large MAGUK scaffold protein 4                 | 93      | -8.41   |
| Bdnf        | brain-derived neurotrophic factor                    | 84      | -3.08   |
| Gria1       | glutamate ionotropic receptor AMPA type subunit 1    | 81      | -4.58   |
| Rhoa        | ras homolog family member A                          | 76      | 2.25    |
| Mapk8       | mitogen-activated protein kinase 8                   | 76      | -2.18   |
| Gng3        | G protein subunit gamma 3                            | 74      | -5.48   |
| Grin2a      | glutamate ionotropic receptor NMDA type subunit 2A   | 73      | -3.68   |
| Gnb5        | G protein subunit beta 5                             | 72      | -3      |
| Ptpcr       | protein tyrosine phosphatase, receptor type, C       | 72      | 15.69   |
| Tp53        | tumor protein p53                                    | 70      | 2.75    |
| Hras        | Harvey rat sarcoma virus oncogene                    | 70      | -2.11   |
| Itpkb       | inositol-trisphosphate 3-kinase B                    | 69      | 2.32    |
| Gnai1       | G protein subunit alpha i1                           | 68      | -2.84   |
| Mapk11      | mitogen-activated protein kinase 11                  | 68      | -5.74   |
| Camk2a      | calcium/calmodulin-dependent protein kinase II alpha | 67      | -139.81 |
| Gnai2       | G protein subunit alpha i2                           | 66      | 2.31    |
| Icam1       | intercellular adhesion molecule 1                    | 64      | 6.54    |
| Ccl2        | C-C motif chemokine ligand 2                         | 64      | 22.32   |
| Mmp9        | matrix metalloproteinase 9                           | 63      | 17.34   |
| Grm5        | glutamate metabotropic receptor 5                    | 62      | -3.18   |
| Grin2b      | glutamate ionotropic receptor NMDA type subunit 2B   | 62      | -2.39   |
| Casp3       | caspase 3                                            | 62      | 2.4     |
| Nras        | neuroblastoma RAS viral oncogene homolog             | 61      | 2.29    |
| Fos         | FBJ osteosarcoma oncogene                            | 61      | -2.45   |
| Grm3        | glutamate metabotropic receptor 3                    | 61      | -5.52   |
| Grm1        | glutamate receptor, metabotropic 1                   | 60      | -2.47   |
| Stat3       | signal transducer and activator of transcription 3   | 59      | 2.55    |
| Gria2       | glutamate ionotropic receptor AMPA type subunit 2    | 59      | -8.97   |
| Tlr4        | toll-like receptor 4                                 | 59      | 3.46    |
| Igf1        | insulin-like growth factor 1                         | 59      | 52.19   |
| Cxcl10      | C-X-C motif chemokine ligand 10                      | 56      | 3.82    |
| Ccr5        | chemokine (C-C motif) receptor 5                     | 55      | 3.14    |
| Syk         | spleen associated tyrosine kinase                    | 55      | 8.47    |
| Cnr1        | cannabinoid receptor 1 (brain)                       | 55      | -3.65   |
| Ccr7        | C-C motif chemokine receptor 7                       | 54      | 3.14    |
| Tlr2        | toll-like receptor 2                                 | 54      | 8.67    |
| Gria4       | glutamate ionotropic receptor AMPA type subunit 4    | 53      | -5.81   |
| Cx3cr1      | C-X3-C motif chemokine receptor 1                    | 52      | 3.93    |
| Snap25      | synaptosomal-associated protein 25                   | 52      | -226.77 |
| Gad1        | glutamate decarboxylase 1                            | 52      | -3.54   |

**4weeks post stroke**

| <b>Gene Symbol</b> | <b>Description</b>                               | <b>Degrees</b> | <b>Fc</b> |
|--------------------|--------------------------------------------------|----------------|-----------|
| Cd44               | CD44 molecule (Indian blood group)               | 17             | 7.93      |
| C1qb               | complement component 1, q subcomponent, B chain  | 15             | 2.88      |
| Fcgr2b             | Fc fragment of IgG, low affinity IIb, receptor   | 14             | 2.78      |
| Spp1               | secreted phosphoprotein 1                        | 12             | 10.97     |
| Cd74               | CD74 molecule                                    | 12             | 10.83     |
| C4a                | complement component 4A (Rodgers blood group)    | 12             | 7.5       |
| C1qa               | complement component 1, q subcomponent, A chain  | 12             | 2.72      |
| C3                 | complement component 3                           | 10             | 8.25      |
| Cd14               | CD14 molecule                                    | 10             | 2.22      |
| Itgb2              | integrin subunit beta 2                          | 10             | 3.42      |
| RT1-CE5            | RT1 class I, locus CE5                           | 8              | 2.99      |
| RT1-A2             | RT1 class Ia, locus A2                           | 8              | 2.62      |
| Spi1               | Spi-1 proto-oncogene                             | 8              | 2.15      |
| Col1a1             | collagen, type I, alpha 1                        | 8              | 15.05     |
| Serping1           | serpin family G member 1                         | 8              | 21.82     |
| Tgfb1              | transforming growth factor, beta 1               | 7              | 2.09      |
| C1s                | complement component 1, s subcomponent           | 7              | 4.93      |
| Cfh                | complement factor H                              | 6              | 3.38      |
| Ctsk               | cathepsin K                                      | 6              | 3.21      |
| Lamb2              | laminin subunit beta 2                           | 6              | 2.02      |
| RT1-M6-2           | RT1 class I, locus M6, gene 2                    | 6              | -2.21     |
| Itgb4              | integrin subunit beta 4                          | 6              | 10.08     |
| Tnc                | tenascin C                                       | 5              | 2.62      |
| Tgfbr2             | transforming growth factor, beta receptor 2      | 4              | 2.58      |
| Mrc1               | mannose receptor, C type 1                       | 4              | 4.12      |
| Trem2              | triggering receptor expressed on myeloid cells 2 | 4              | 2.17      |
| Col4a3             | collagen type IV alpha 3 chain                   | 4              | -2.04     |
| Col3a1             | collagen type III alpha 1 chain                  | 4              | 18.13     |
| Cyba               | cytochrome b-245 alpha chain                     | 3              | 4.2       |
| Cd4                | Cd4 molecule                                     | 3              | 4.08      |
| Fos                | FBJ osteosarcoma oncogene                        | 3              | -2.66     |
| Acp5               | acid phosphatase 5, tartrate resistant           | 2              | 2.16      |
| Lgmn               | legumain                                         | 1              | 2.18      |

**8weeks post stroke**

| <b>Gene Symbol</b> | <b>Description</b>                              | <b>Degrees</b> | <b>Fc</b> |
|--------------------|-------------------------------------------------|----------------|-----------|
| Cd44               | CD44 molecule (Indian blood group)              | 14             | 6.13      |
| Fcgr2b             | Fc fragment of IgG, low affinity IIb, receptor  | 13             | 2.12      |
| C1qb               | complement component 1, q subcomponent, B chain | 13             | 2.39      |
| Cd74               | CD74 molecule                                   | 12             | 15.2      |
| C1qc               | complement component 1, q subcomponent, C chain | 11             | 2.68      |
| Cd14               | CD14 molecule                                   | 10             | 2.58      |

|          |                                                   |    |       |
|----------|---------------------------------------------------|----|-------|
| C4a      | complement component 4A (Rodgers blood group)     | 10 | 5.42  |
| Spp1     | secreted phosphoprotein 1                         | 10 | 9.09  |
| RT1-A2   | RT1 class Ia, locus A2                            | 9  | 3.53  |
| Itgb2    | integrin subunit beta 2                           | 9  | 2.36  |
| C1qa     | complement component 1, q subcomponent, A chain   | 9  | 2.73  |
| Serping1 | serpin family G member 1                          | 8  | 16.63 |
| Icam1    | intercellular adhesion molecule 1                 | 8  | 2.1   |
| B2m      | beta-2 microglobulin                              | 7  | 2.17  |
| Itgb4    | integrin subunit beta 4                           | 7  | 10.95 |
| Cd40     | CD40 molecule                                     | 7  | 2.28  |
| Mrc1     | mannose receptor, C type 1                        | 6  | 3.12  |
| Cfh      | complement factor H                               | 6  | 2.61  |
| Col6a2   | collagen, type VI, alpha 2                        | 6  | 2.16  |
| Lamb2    | laminin subunit beta 2                            | 6  | 2.15  |
| Col1a1   | collagen, type I, alpha 1                         | 6  | 13.87 |
| Tapbp    | TAP binding protein (tapasin)                     | 4  | 2.01  |
| Cd4      | Cd4 molecule                                      | 4  | 2.38  |
| Cyba     | cytochrome b-245 alpha chain                      | 4  | 4.4   |
| Thbs2    | thrombospondin 2                                  | 4  | 3.49  |
| Tnc      | tenascin C                                        | 4  | 2.07  |
| Col3a1   | collagen type III alpha 1 chain                   | 4  | 13.73 |
| Thbd     | thrombomodulin                                    | 3  | 2.95  |
| Tap2     | transporter 2, ATP-binding cassette, sub-family B | 2  | 2.09  |
| Colec12  | collectin sub-family member 12                    | 1  | 5.27  |
| F10      | coagulation factor X                              | 1  | 2.11  |

---
